# Supplementary material
Source: HighWire-hosted journal article supplement (https://jnis.bmj.com/highwire/filestream/174501/field_highwire_adjunct_files/0/jnis-2022-019326supp001_data_supplement.pdf)
Supplement: jnis-2022-019326supp001_data_supplement.pdf [file jnis-2022-019326supp001_data_supplement.pdf]

**Supplemental Table 1.** Baseline characteristics stratified by the SEDAN risk score

| Variables                 | SEDAN score (0-2)    |                    | P <sub>1</sub> | SEDAN score (3-6)    |                    | P <sub>2</sub> |
|---------------------------|----------------------|--------------------|----------------|----------------------|--------------------|----------------|
|                           | EVT alone<br>(n=132) | IVT+EVT<br>(n=142) |                | EVT alone<br>(n=179) | IVT+EVT<br>(n=174) |                |
| Age (year)                | 67(55-72)            | 68(59-73)          | 0.15           | 74(65-79)            | 72(62-78)          | 0.22           |
| Male, %                   | 82(62.1)             | 84(59.2)           | 0.62           | 95(53.1)             | 93(53.5)           | 0.94           |
| Weight, kg                | 66.0±10.8            | 64.5±11.4          | 0.19           | 66.1±12.2            | 64.7±11.5          | 0.33           |
| <b>Medical history</b>    |                      |                    |                |                      |                    |                |
| Hypertension, %           | 66(50.0)             | 84(59.2)           | 0.13           | 115(64.3)            | 112(64.4)          | 0.98           |
| Diabetes mellitus, %      | 14(10.6)             | 17(12.0)           | 0.72           | 39(21.8)             | 50(28.7)           | 0.13           |
| Atrial fibrillation, %    | 54(40.9)             | 65(45.8)           | 0.42           | 93(52.0)             | 79(45.4)           | 0.22           |
| Prior ischemic stroke, %  | 18(13.6)             | 18(12.7)           | 0.82           | 23(12.9)             | 27(15.5)           | 0.47           |
| Smoking, %                | 34(25.8)             | 37(26.1)           | 0.96           | 36(20.1)             | 31(17.8)           | 0.58           |
| Pre-stroke mRS≥1, %       | 15(11.4)             | 13(9.2)            | 0.44           | 11(6.2)              | 10(5.8)            | 0.60           |
| Prior antiplatelet use, % | 19(14.4)             | 20(14.1)           | 0.94           | 27(15.1)             | 31(17.8)           | 0.49           |
| Baseline NIHSS score      | 15(10-20)            | 16(12-21)          | 0.33           | 18(14-23)            | 19(15-23)          | 0.49           |
| Baseline glucose (mmol/L) | 6.5±1.2              | 6.7±1.6            | 0.90           | 8.6±3.5              | 8.8±3.3            | 0.38           |
| Onset to puncture (min)   | 199±57               | 203±59             | 0.68           | 202±61               | 213±59             | 0.08           |
| <b>Image variables</b>    |                      |                    |                |                      |                    |                |
| Hyperdense artery sign, % | 25(18.9)             | 26(18.3)           | 0.89           | 115(64.3)            | 113(64.9)          | 0.89           |
| Early infarct sign, %     | 61(46.2)             | 62(43.7)           | 0.97           | 152(84.9)            | 148(85.1)          | 0.97           |
| ASPECTS                   | 10(8-10)             | 10(9-10)           | 0.38           | 8(6-9)               | 8(6-9)             | 0.27           |
| Collateral score          |                      |                    | 0.61           |                      |                    | 0.80           |
| 0-1, %                    | 102(77.3)            | 106(74.7)          |                | 141(78.8)            | 139(79.9)          |                |
| 2-3, %                    | 30(22.7)             | 36(25.4)           |                | 38(21.2)             | 35(20.1)           |                |
| Occlusion site            |                      |                    | 0.76           |                      |                    | 0.58           |
| ICA, %                    | 29(22.1)             | 33(23.6)           |                | 82(46.3)             | 76(43.7)           |                |
| M1, %                     | 79(60.3)             | 87(62.1)           |                | 79(44.6)             | 85(48.9)           |                |
| M2, %                     | 23(17.6)             | 20(14.3)           |                | 16(9.0)              | 12(6.9)            |                |

SEDAN: blood Sugar, Early infarct signs and [hyper]Dense cerebral artery sign, Age, and NIHSS; EVT: endovascular thrombectomy; IVT: intravenous thrombolysis; mRS: modified Rankin Scale; NIHSS: National Institutes of Health Stroke Scale; ASPECTS: Alberta Stroke Program Early CT Score; ICA: internal carotid artery.

**Supplemental Table 2.** Baseline characteristics stratified by the GRASPS risk score

| Variables                        | GRASPS score (45-80) |                    | P <sub>1</sub> | GRASPS score (81-105) |                    | P <sub>2</sub> |
|----------------------------------|----------------------|--------------------|----------------|-----------------------|--------------------|----------------|
|                                  | EVT alone<br>(n=124) | IVT+EVT<br>(n=114) |                | EVT alone<br>(n=190)  | IVT+EVT<br>(n=205) |                |
| Age (year)                       | 63(52-69)            | 63(55-70)          | 0.40           | 74(67-79)             | 73(64-79)          | 0.28           |
| Male, %                          | 74(59.7)             | 61(53.5)           | 0.34           | 105(55.3)             | 119(58.1)          | 0.58           |
| Weight, kg                       | 66.6±11.0            | 65.4±10.4          | 0.41           | 65±11.9               | 64.2±12.0          | 0.17           |
| <b>Medical history</b>           |                      |                    |                |                       |                    |                |
| Hypertension, %                  | 57(46.0)             | 55(48.3)           | 0.73           | 124(65.3)             | 143(69.8)          | 0.34           |
| Diabetes mellitus, %             | 15(12.1)             | 21(18.4)           | 0.17           | 38(20.0)              | 47(22.9)           | 0.48           |
| Atrial fibrillation, %           | 49(39.5)             | 44(38.6)           | 0.88           | 99(52.1)              | 101(49.3)          | 0.57           |
| Prior ischemic stroke, %         | 14(11.3)             | 12(10.5)           | 0.85           | 27(14.2)              | 33(16.1)           | 0.60           |
| Smoking, %                       | 33(26.6)             | 28(24.6)           | 0.72           | 38(20.0)              | 41(20.0)           | 1.00           |
| Pre-stroke mRS <sub>≥1</sub> , % | 13(10.5)             | 9(7.9)             | 0.44           | 13(6.8)               | 14(6.8)            | 0.97           |
| Prior antiplatelet use, %        | 19(15.3)             | 11(9.7)            | 0.19           | 28(14.7)              | 42(20.5)           | 0.13           |
| Baseline NIHSS score             | 12(10-15)            | 13(10-15)          | 0.47           | 19(16-23)             | 20(17-24)          | 0.35           |
| Baseline glucose (mmol/L)        | 6.9±2.2              | 7.1±2.4            | 0.87           | 8.3±3.3               | 8.3±3.1            | 0.74           |
| Onset to puncture (min)          | 202±58               | 205±62             | 0.93           | 200±60                | 211±58             | 0.07           |
| <b>Image variables</b>           |                      |                    |                |                       |                    |                |
| Hyperdense artery sign, %        | 45(36.9)             | 44(38.9)           | 0.75           | 95(50.3)              | 95(46.8)           | 0.49           |
| Early infarct sign, %            | 74(60.7)             | 75(66.4)           | 0.36           | 139(73.5)             | 135(66.5)          | 0.13           |
| ASPECTS                          | 9(7-10)              | 9(8-10)            | 0.80           | 8(6-10)               | 8(6-10)            | 0.62           |
| Collateral score                 |                      |                    | 0.32           |                       |                    | 0.45           |
| 0-1, %                           | 92(74.2)             | 78(68.4)           |                | 152(80.0)             | 170(82.9)          |                |
| 2-3, %                           | 32(25.8)             | 36(31.6)           |                | 38(20.0)              | 35(17.1)           |                |
| Occlusion site                   |                      |                    | 0.97           |                       |                    | 0.38           |
| ICA, %                           | 32(26.2)             | 31(27.4)           |                | 79(42.3)              | 79(38.9)           |                |
| M1, %                            | 74(60.7)             | 68(60.2)           |                | 85(45.5)              | 105(51.7)          |                |
| M2, %                            | 16(13.1)             | 14(12.4)           |                | 23(12.3)              | 18(8.9)            |                |

GRASPS: Glucose, Race, Age, Sex, systolic blood Pressure, and Severity of stroke; EVT: endovascular thrombectomy; IVT: intravenous thrombolysis; mRS: modified Rankin Scale; NIHSS: National Institutes of Health Stroke Scale; ASPECTS: Alberta Stroke Program Early CT Score; ICA: internal carotid artery.

**Supplemental Table 3.** Primary, secondary and safety outcomes stratified by the SEDAN risk score (EVT alone versus IVT+EVT)

| Outcome                                           | SEDAN score (0-2) |           | Adjusted OR            | SEDAN score (3-6) |           | Adjusted OR      |
|---------------------------------------------------|-------------------|-----------|------------------------|-------------------|-----------|------------------|
|                                                   | EVT alone         | IVT+EVT   |                        | EVT alone         | IVT+EVT   |                  |
| <b>Primary outcome</b>                            |                   |           |                        |                   |           |                  |
| Functional independence at 90 d (mRS 0-2), %      | 60(45.5)          | 71(50.0)  | 1.00(0.58-1.71)        | 50(28.1)          | 47(27.0)  | 1.14 (0.69-1.88) |
| <b>Secondary outcomes</b>                         |                   |           |                        |                   |           |                  |
| Favorable functional outcome at 90 d (mRS 0-1), % | 43(32.6)          | 50(35.2)  | 1.07(0.62-1.86)        | 31(17.4)          | 21(12.1)  | 1.54(0.83-2.86)  |
| Successful reperfusion before EVT, %              | 2(1.5)            | 16(11.5)  | <b>0.12(0.03-0.53)</b> | 6(3.5)            | 6(3.5)    | 1.00(0.31-3.22)  |
| Successful reperfusion after EVT, %               | 106(82.2)         | 119(86.2) | 0.75(0.38-1.46)        | 136(78.6)         | 144(83.2) | 0.65(0.37-1.13)  |
| <b>Safety outcomes</b>                            |                   |           |                        |                   |           |                  |
| Death, %                                          | 13(9.9)           | 17(12.0)  | 0.62(0.28-1.39)        | 46(25.8)          | 39(22.4)  | 1.10(0.65-1.85)  |
| Symptomatic intracranial hemorrhage, %            | 3(2.3)            | 7(4.9)    | 0.46(0.12-1.83)        | 11(6.2)           | 13(7.5)   | 0.74(0.32-1.74)  |
| Asymptomatic intracranial hemorrhage, %           | 40(30.3)          | 37(26.1)  | 1.13(0.65-1.96)        | 67(37.4)          | 79(45.4)  | 0.78(0.51-1.20)  |

SEDAN: blood Sugar, Early infarct signs and [hyper]Dense cerebral artery sign, Age, and National Institutes of Health Stroke Score; EVT: endovascular thrombectomy; IVT: intravenous thrombolysis; OR: odds ratio; mRS: modified Rankin Scale.

**Supplemental Table 4.** Primary, secondary and safety outcomes stratified by the GRASPS risk score (EVT alone versus IVT+EVT)

| Outcome                                           | GRASPS score (45-80) |          | Adjusted OR            | GRASPS score (81-105) |           | Adjusted OR     |
|---------------------------------------------------|----------------------|----------|------------------------|-----------------------|-----------|-----------------|
|                                                   | EVT alone            | IVT+EVT  |                        | EVT alone             | IVT+EVT   |                 |
| <b>Primary outcome</b>                            |                      |          |                        |                       |           |                 |
| Functional independence at 90 d (mRS 0-2), %      | 66(53.2)             | 62(54.4) | 1.20(0.69-2.06)        | 46(24.3)              | 57(27.9)  | 0.88(0.54-1.43) |
| <b>Secondary outcomes</b>                         |                      |          |                        |                       |           |                 |
| Favorable functional outcome at 90 d (mRS 0-1), % | 44(35.5)             | 43(37.7) | 1.06(0.61-1.84)        | 32(16.9)              | 29(14.2)  | 1.32(0.75-2.35) |
| Successful reperfusion before EVT, %              | 3(2.5)               | 10(8.9)  | <b>0.25(0.06-1.00)</b> | 5(2.8)                | 13(6.5)   | 0.43(0.15-1.26) |
| Successful reperfusion after EVT, %               | 97(80.2)             | 94(83.9) | 0.63(0.32-1.26)        | 146(80.2)             | 171(85.1) | 0.70(0.41-1.20) |
| <b>Safety outcomes</b>                            |                      |          |                        |                       |           |                 |
| Death, %                                          | 12(9.7)              | 12(10.5) | 0.76(0.32-1.82)        | 48(25.4)              | 45(22.1)  | 1.09(0.67-1.47) |
| Symptomatic intracranial hemorrhage, %            | 2(1.6)               | 5(4.4)   | 0.33(0.06-1.78)        | 12(6.3)               | 15(7.3)   | 0.85(0.38-1.88) |
| Asymptomatic intracranial hemorrhage, %           | 41(33.1)             | 36(31.6) | 1.01(0.57-1.79)        | 67(35.3)              | 81(39.5)  | 0.88(0.58-1.33) |

GRASPS: Glucose, Race, Age, Sex, systolic blood Pressure, and Severity of stroke; EVT: endovascular thrombectomy; IVT: intravenous thrombolysis; OR: odds ratio; mRS: modified Rankin Scale.
